# Supplementary material for: Improving Current Knowledge on Seroprevalence and Genetic Characterization of Swine Influenza Virus in Croatian Pig Farms: A Retrospective Study
Source: MDPI journal article supplement (doi:10.3390/pathogens10111527), 2021-11-22
Supplement: s1 [file s1]

**Table S1.** Results of serological testing (ELISA) within different pig categories.

| Category                 | <i>n</i> examined samples | IAV NP Ab positive |       |
|--------------------------|---------------------------|--------------------|-------|
|                          |                           | <i>n</i>           | %     |
| Piglets                  | 1-4 weeks                 | 35                 | 8     |
|                          | 5-10 weeks                | 260                | 33    |
|                          | 11-20 weeks               | 249                | 27    |
| Fatteners >20 weeks      | 153                       | 86                 | 56,2  |
| Gilts                    | 278                       | 99                 | 35,6  |
| First parity sows        | 70                        | 43                 | 61,4  |
| Sows                     | 130                       | 64                 | 49,2  |
| Boars                    | 132                       | 17                 | 12,9  |
| Pigs of unknown category | 229                       | 89                 | 38,9  |
| Total:                   | 1536                      | 466                | 30,3% |

**Table S2.** Mean seroprevalence of IAV positive serum samples subtyped by HI (%) presented in different age groups.

| category                         | piglets 1-4 weeks | piglets 5-10 weeks | piglets 11-20 weeks | fatteners >20 weeks | gilts | first parity sows | sows | boars | pigs of unknown category |
|----------------------------------|-------------------|--------------------|---------------------|---------------------|-------|-------------------|------|-------|--------------------------|
| tested sera samples ( <i>n</i> ) | 8                 | 38                 | 13                  | 91                  | 74    | 43                | 62   | 19    | 62                       |
| HI (%)                           |                   |                    |                     |                     |       |                   |      |       |                          |
| H1N1                             | 75                | 36.8               | 30.8                | 24.2                | 55.4  | 46.5              | 64.5 | 47.4  | 35.5                     |
| H3N2                             | 87.5              | 47.4               | 30.8                | 9.9                 | 60.8  | 69.8              | 82.3 | 10.5  | 14.5                     |
| H1N2                             | 62.5              | 42.1               | 30.8                | 8.8                 | 41.9  | 46.5              | 22.6 | 5.3   | 14.5                     |
| negative                         | 12.5              | 39.5               | 53.8                | 71.4                | 6.8   | 23.3              | 12.9 | 73.7  | 54.8                     |

**Table S3.** Total of lung samples tested by Real-time RT-qPCR (M gene) and quantification cycle threshold (Cq) values.

| County         | Farm (F)/<br>backyard farm<br>(BF)/slaughterhouse (SL) | <i>n</i> lungs | Category            | Sample ID        | Ct           |
|----------------|--------------------------------------------------------|----------------|---------------------|------------------|--------------|
| Brod-Posavina  | BF                                                     | 3              | Piglets 10-12 weeks | 2209/1-3/2014    | no Ct        |
|                | BF                                                     | 2              | Piglets 10-12 weeks | 631/2/2015       | no Ct        |
|                | BF                                                     | 3              | Piglets 9-12 weeks  | 631/3/2015       | <b>28,61</b> |
|                | BF                                                     | 4              | Piglets 9-12 weeks  | P1-3/2015        | no Ct        |
| Varaždin       | BF                                                     | 4              | Piglets 4-10 weeks  | 972/1-4/2014     | no Ct        |
|                |                                                        |                |                     | 2319/1/2011      | -            |
|                |                                                        |                |                     | 2319/2/2011      | 24,40        |
|                |                                                        |                |                     | 2319/3/2011      | 30,26        |
|                | F14                                                    | 5              | Piglets 9-14 weeks  | 2319/4/2011      | 19,32        |
|                |                                                        |                |                     | 1600/1/2012      | 38,41        |
|                |                                                        |                |                     | 1600/9/2012      | 23,12        |
|                |                                                        |                |                     | 1600/1,3,10/2012 | -            |
|                | F13                                                    | 7              | Piglets 4-10 weeks  | 331/1-7/2016     | -            |
|                |                                                        |                |                     | 1954/1-3/2013    | -            |
|                |                                                        |                |                     | PPA1-3/2014      | -            |
|                |                                                        |                |                     | PA1-6/2015       | -            |
| Vukovar-Srijem | F13                                                    | 3              | Piglets 4 weeks     | PA7-9/2015       | -            |
|                |                                                        |                |                     | 853/1-3/2016     | -            |
|                |                                                        |                |                     | 854/1/2016       | 16,94        |
|                |                                                        |                |                     | 854/5/2016       | 22,94        |
|                | F18                                                    | 5              | Piglets 4-10 weeks  | 854/2,3,4/2016   | -            |
|                |                                                        |                |                     | 855/1-3/2016     | -            |
|                |                                                        |                |                     | 855/4/2016       | 32,28        |
|                |                                                        |                |                     | 2571/1-3/2013    | -            |
| Zagreb         | F18                                                    | 3              | Piglets 9-12 weeks  | 2571/1-3/2013    | -            |
|                | SL                                                     | 72             | Fatteners           | 1-72/2015        | -            |

|               |            |                    |               |                   |
|---------------|------------|--------------------|---------------|-------------------|
|               | 4          | Piglets 6-11 weeks | 2500/1-4/2012 | -                 |
| F16           | 6          | Piglets 6-11 weeks | 2318/1-6/2013 | -                 |
|               | 1          | Piglet 10 weeks    | 1002/2014     | -                 |
|               | 1          | Piglet 4 weeks     | PP/2015       | -                 |
| <b>Total:</b> | <b>142</b> |                    |               | <b>9 positive</b> |

**Table S4.** Total of nasopharyngeal swabs tested by Real-time RT-qPCR (M gene) and quantification cycle threshold (Cq) values.

| County         | Farm (F)/<br>backyard farm<br>(BF)/slaughterhouse (SL) | n lungs   | Category           | Sample ID   | Cq                |
|----------------|--------------------------------------------------------|-----------|--------------------|-------------|-------------------|
|                | F14                                                    | 10        | Sows               | B1-10/2012  | -                 |
|                |                                                        | 10        | Piglets 6-11 weeks | B11-20/2012 | -                 |
|                |                                                        |           |                    | 1/2016      | 26,82             |
|                |                                                        |           |                    | 2/2016      | 32,71             |
|                |                                                        |           |                    | 3/2016      | 23,96             |
| Vukovar-Srijem |                                                        |           |                    | 4/2016      | 37,46             |
|                | F13                                                    | 9         | Piglets 4-6 weeks  | 5/2016      | 32,10             |
|                |                                                        |           |                    | 6/2016      | 35,74             |
|                |                                                        |           |                    | 7/2016      | 37,24             |
|                |                                                        |           |                    | 8/2016      | -                 |
|                |                                                        |           |                    | 9/2016      | -                 |
| <b>Total:</b>  |                                                        | <b>29</b> |                    |             | <b>7 positive</b> |

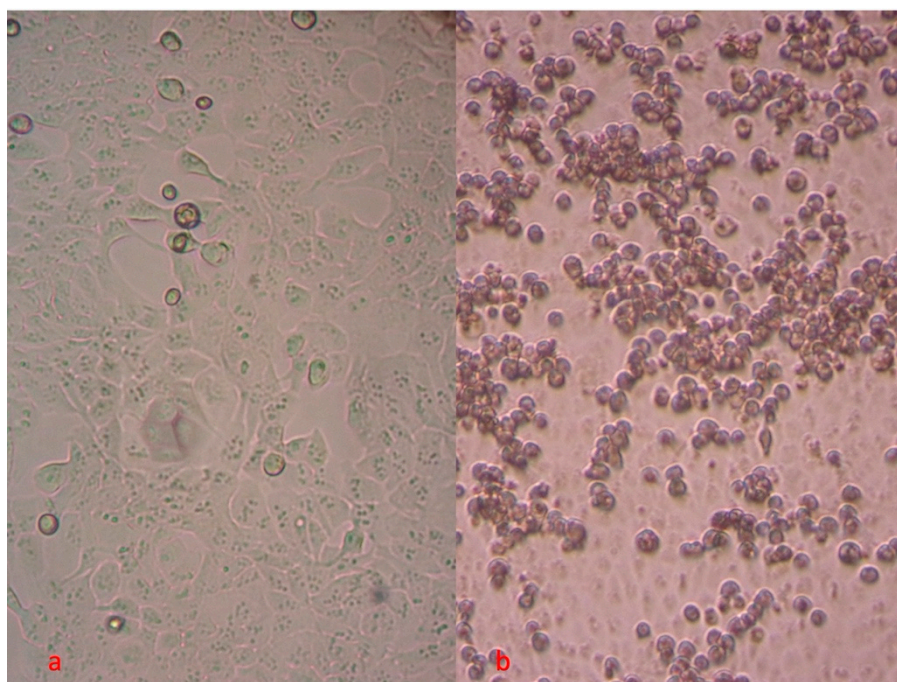

**Figure S1.** MDCK cell culture, 10x. Inoculated sample 2319/4/2011 (H1N1). (a) Early formation of influenza-induced CPE, 2<sup>nd</sup> day postseed. (b) Influenza-induced CPE, 4<sup>th</sup> day postseed. Infected cells are detached and floating in the culture medium.
